# Supplementary material for: Fluorescence Based on Surface Plasmon Coupled Emission for Ultrahigh Sensitivity Immunoassay of Cardiac Troponin I
Source: MDPI journal article supplement (doi:10.3390/biomedicines9050448), 2021-04-21
Supplement: s1 [file s1]

## Supplementary Materials

### Section 1. The enhancement factor ( $\eta$ ) of the detected fluorescence

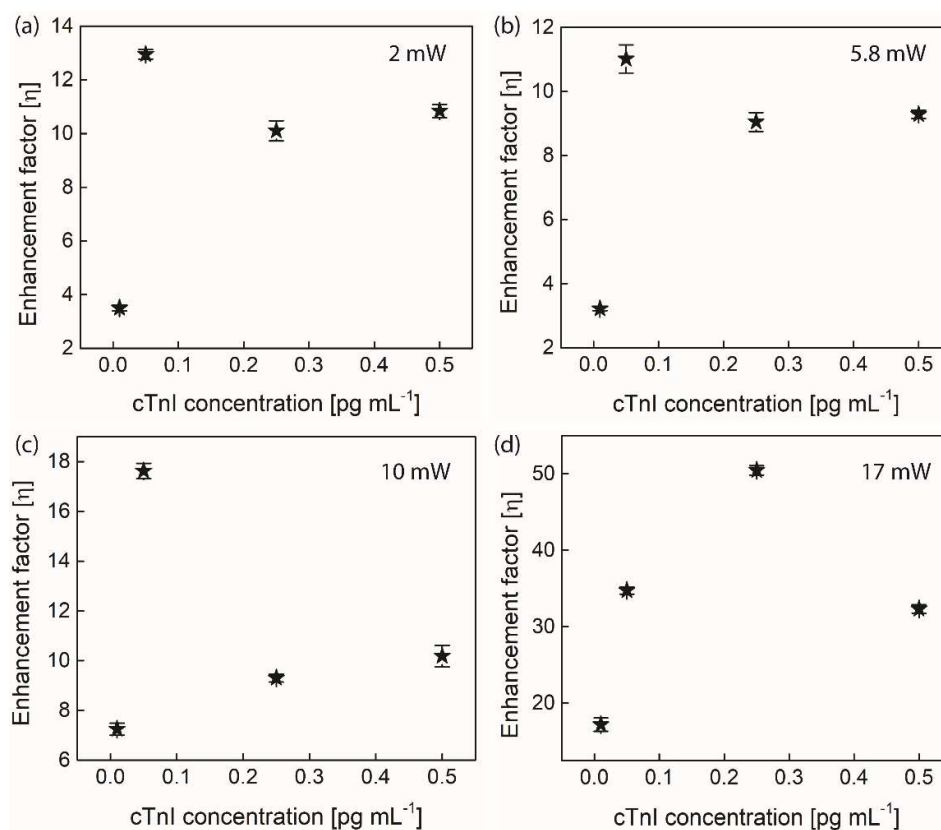

**Figure S1.** The enhancement factor ( $\eta$ ) of the detected fluorescence signal versus cTnI concentration for different excitation powers of (a) 2 mW, (b) 5.8 mW, (c) 10 mW and (d) 17 mW.

### Section 2. The curve fitting function of measured data for quantitative detection of cTnI

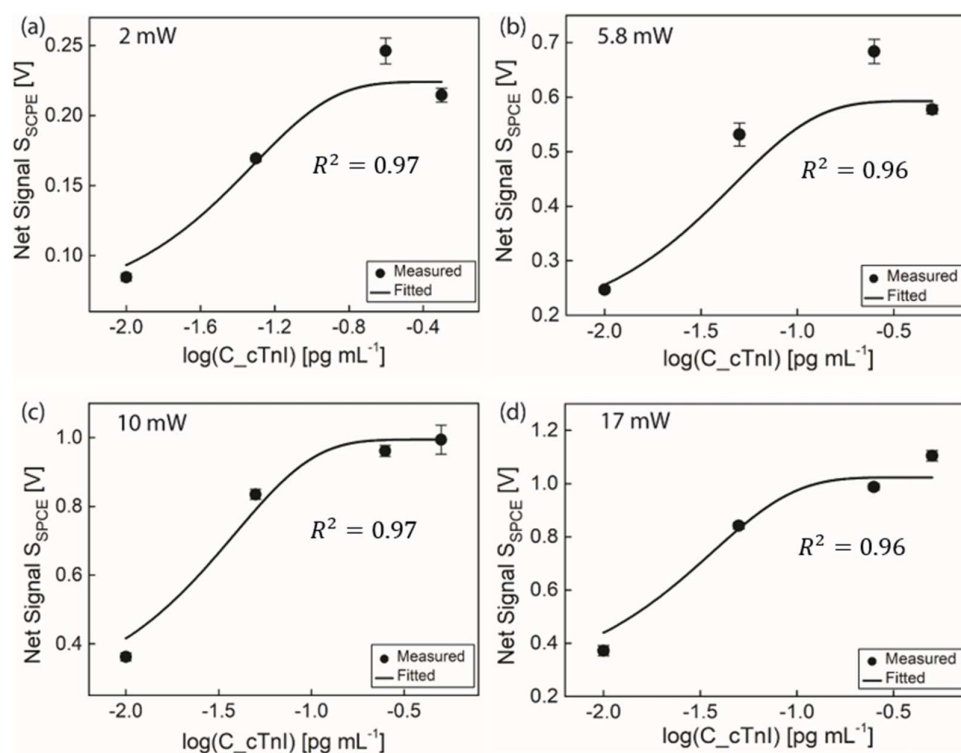

**Figure S2.** Fitting the function of the form  $S_{SPCE} = S_0 + f_1[1 - \exp(-f_2 C_{cTnI})]$  to the measured data for quantitative detection of cTnI concentration,  $C_{cTnI}$ . The  $f_1$  and  $f_2$  are the fitting parameters while  $S_0$  is obtained by estimating the linear slope at  $C_{cTnI} = 0$  extended from the low concentration data. (a)  $S_0 = 0.063$ ,  $f_1 = 0.16$ ,  $f_2 = -20.6$  for excitation power of 2 mW, (b)  $S_0 = 0.17$ ,  $f_1 = 0.42$ ,  $f_2 = 21.3$  for 5.8 mW, (c)  $S_0 = 0.24$ ,  $f_1 = 0$ ,  $f_2 = 26.0$  for 10mW, (d)  $S_0 = 0.25$ ,  $f_1 = 0.77$ ,  $f_2 = 27.5$  for 17 mW.
